# Supplementary material for: Levofloxacin prophylaxis vs no prophylaxis in patients with neutropenia within an endemic country for carbapenem-resistant GNB
Source: PubMed Central journal article supplement — Blood Adv. 2022 Nov 24;7(9):1621–34. doi: 10.1182/bloodadvances.2022008226 (PMC10182274; doi:10.1182/bloodadvances.2022008226), 2022-11-24
Supplement: BLOODA_ADV-2022-008226-mmc1.pdf [file BLOODA_ADV-2022-008226-mmc1.pdf]

## 1 ***Supplementary Transplantation-related Procedures***

2 In the autologous group, the conditioning regimen was based on i. melphalan (200 or 140  
3 mg/sm, respectively MAC and RIC conditioning) on day -2 for multiple myeloma  
4 patients; ii. on carmustine (400 mg/sm) on day -6 and thiotepa 5 mg/kg/12 hours on days  
5 -5 and -4 for patients affected by primary central nervous system lymphoma (PCNSL);  
6 and iii. on the BEAM scheme (carmustine 300 mg/sm on day -7, cytarabine 200 mg/sm/12  
7 hours, etoposide 200 mg/sm on days -6, -5, -4, -3 and melphalan 140 mg/sm on day -2)  
8 for patients suffering from Hodgkin and non Hodgkin lymphomas other than PCNSL. For  
9 patients affected by neurological disease, conditioning was highly immunosuppressive,  
10 using BEAM plus anti-thymocyte globulin (ATG)<sup>1</sup>. The graft source was PBSCs,  
11 mobilized with subcutaneous granulocyte-colony-stimulating factor, collected by  
12 leukapheresis and cryopreserved. Filgrastim was administered from Day +1 after  
13 autologous transplant until neutrophil recovery (II day of N > 1000/mcl).

14 In the allogeneic group, PBSCs were mobilized with subcutaneous granulocyte-colony-  
15 stimulating factor and collected by leukapheresis and infused without any *ex-vivo*  
16 manipulation in the majority of transplants. Bone marrow was collected from the  
17 posterior superior iliac crests and infused according to standard guidelines. Cord blood  
18 units were infused intravenously or intra bone.

19 Starting from January 2019, patients transplanted with a CD3<sup>+</sup> graft content above  
20  $300 \times 10^6/\text{kg}$  routinely received one single administration of ATG on day 5 at the dose of  
21 5 mg/kg with the aim of minimizing GVHD risk<sup>2</sup>.

22 Starting from May 2020, we added the use of granulocyte-colony-stimulating-factors in  
23 all transplant recipients, given as a single peg-filgrastim dose or daily filgrastim until  
24 engraftment.

26 **Supplementary Figure 1.** Cumulative incidence of infection-related mortality until day  
 27 +90 post-transplant according to the use of prophylaxis in allo-HSCT recipients.

28

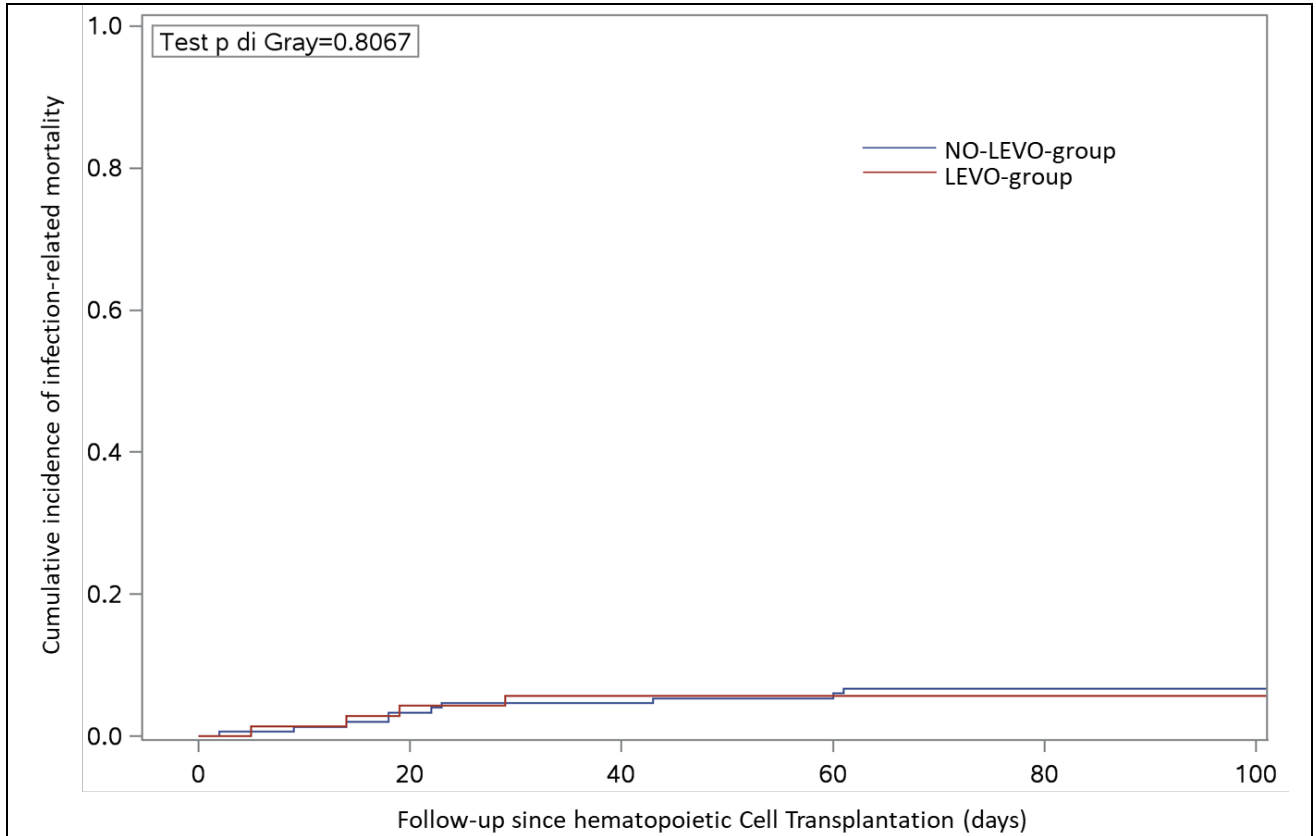

Cumulative incidence of IRM in allogenic stem cell transplantation (95%CI)

| Follow-up (days) | LEVO-group       | NO-LEVO-group    |
|------------------|------------------|------------------|
| 30               | 5.7 (1.8 – 12.9) | 4.7 (2.1 – 8.9)  |
| 60               | 5.7 (1.8 – 12.9) | 6.0 (3.0 – 10.6) |
| 90               | 5.7 (1.8 – 12.9) | 6.7 (3.4 – 11.5) |

29

30

31

32

33

34 **Supplementary Table 1.** Detailed description of the more represented types of antibiotic  
 35 escalation in autologous stem cell transplantation.

| Use of levofloxacin prophylaxis | Broad-spectrum antibiotics at first FN episode | DAP or VAN | AMK or GEN | MEM | Frequency | Percent | Cumulative frequency | Cumulative percent |
|---------------------------------|------------------------------------------------|------------|------------|-----|-----------|---------|----------------------|--------------------|
| NO                              | PTZ                                            | 0          | 0          | 1   | 6         | 12.77   | 11                   | 23.40              |
| NO                              | PTZ                                            | 1          | 0          | 0   | 12        | 25.53   | 23                   | 48.94              |
| NO                              | PTZ                                            | 1          | 0          | 1   | 11        | 23.40   | 34                   | 72.34              |
| YES                             | PTZ                                            | 1          | 0          | 1   | 2         | 4.26    | 43                   | 91.49              |
| YES                             | PTZ+VAN                                        | 0          | 0          | 1   | 2         | 4.26    | 45                   | 95.74              |
| YES                             | CAZ                                            | 0          | 0          | 1   | 2         | 4.26    | 47                   | 100.00             |

36 Legend: 0=no; 1=yes

37

38 **Supplementary Table 2.** Detailed description of the more represented types of antibiotic  
 39 escalation in allogeneic HSCT.

| Use of levofloxacin prophylaxis | Broad-spectrum antibiotics at first FN episode | DAP or VAN | AMK or GEN | MEM | Frequency | Percent | Cumulative frequency | Cumulative percent |
|---------------------------------|------------------------------------------------|------------|------------|-----|-----------|---------|----------------------|--------------------|
| NO                              | MEM                                            | 0          | 1          | -   | 2         | 1.69    | 5                    | 4.24               |
| NO                              | MEM                                            | 1          | 0          | -   | 4         | 3.39    | 9                    | 7.63               |
| NO                              | PTZ                                            | 0          | 0          | 1   | 19        | 16.10   | 32                   | 27.12              |
| NO                              | PTZ                                            | 0          | 1          | 1   | 5         | 4.24    | 38                   | 32.20              |
| NO                              | PTZ                                            | 1          | 0          | 0   | 14        | 11.86   | 52                   | 44.07              |
| NO                              | PTZ                                            | 1          | 0          | 1   | 17        | 14.41   | 69                   | 58.47              |
| NO                              | PTZ                                            | 1          | 1          | 1   | 3         | 2.54    | 72                   | 61.02              |
| YES                             | CAZ                                            | 1          | 0          | 1   | 4         | 3.39    | 81                   | 68.64              |
| YES                             | MEM                                            | 1          | 0          | -   | 4         | 3.39    | 86                   | 72.88              |
| YES                             | PTZ                                            | 0          | 0          | 1   | 11        | 9.32    | 104                  | 88.14              |
| YES                             | PTZ                                            | 0          | 1          | 1   | 2         | 1.69    | 106                  | 89.83              |
| YES                             | PTZ                                            | 1          | 0          | 1   | 12        | 10.17   | 118                  | 100.00             |

40 Legend: 0=no; 1=yes

41 **Supplementary Table 3.** Patients' distribution according to ESBL BSI or CR BSI or  
 42 acute GHVD occurrence within 100-day since allogeneic HSCT.

| Use of levofloxacin prophylaxis | ESBL BSI <100 days | CR BSI <100 days | Acute GVHD | Frequency | Percent | Cumulative frequency | Cumulative percent |
|---------------------------------|--------------------|------------------|------------|-----------|---------|----------------------|--------------------|
| NO                              | 0                  | 0                | 0          | 107       | 50.95   | 107                  | 50.95              |
| NO                              | 0                  | 0                | 1          | 32        | 15.24   | 139                  | 66.19              |
| NO                              | 1                  | 0                | 0          | 1         | 0.48    | 140                  | 66.67              |
| NO                              | 1                  | 0                | 1          | 3         | 1.43    | 143                  | 68.10              |
| NO                              | 1                  | 1                | 1          | 1         | 0.48    | 144                  | 68.57              |
| YES                             | 0                  | 0                | 0          | 53        | 25.24   | 197                  | 93.81              |
| YES                             | 0                  | 0                | 1          | 11        | 5.24    | 208                  | 99.05              |
| YES                             | 0                  | 1                | 1          | 1         | 0.48    | 209                  | 99.52              |
| YES                             | 1                  | 0                | 0          | 1         | 0.48    | 210                  | 100.00             |

43 Legend: 0=no; 1=yes

44

45

46

47

48

49

50

51

52

53

54

55

56

57 **Supplementary Table 4.** Etiology of Gram positive bacteria pre-engraftment blood-  
 58 stream infections and antimicrobial resistance in ASCT and allo-HSCT recipients,  
 59 according to levofloxacin prophylaxis administration.

| Blood cultures' isolates characteristics | Total bacterial isolates from blood cultures |              |         |           |                      |              |
|------------------------------------------|----------------------------------------------|--------------|---------|-----------|----------------------|--------------|
|                                          | Group A                                      | Group B      | p-Value | Group C   | Group D              | p-Value      |
| <b><u>Gram positive bacteria</u></b>     | <b>0</b>                                     | <b>10</b>    | -       | <b>18</b> | <b>37</b>            | -            |
| <i>Staphylococcus</i> spp                | 0 (0%)                                       | 5 (50%)      | -       | 4 (22%)   | 17 (46%)             | 0.139        |
| <i>S. aureus</i>                         | 0 (0%)                                       | 1 (20%)      | -       | 0 (0%)    | 17 (46%)             | -            |
| – MR                                     | 0 (0%)                                       | 1 (100%)     |         | 0 (0%)    | 0 (0%)               |              |
| – FQs resistant                          | 0 (0%)                                       | 0 (0%)       |         | 0 (0%)    | 0 (0%)               |              |
| CoNS                                     | 0 (0%)                                       | 4 (80%)      |         | 4 (100%)  | 17 (100%)            |              |
| – MR                                     | 0 (0%)                                       | 2 (100%)     |         | 4 (100%)  | 17 (100%)            |              |
| – FQs resistant                          | 0 (0%)                                       | 4 (100%)     |         | 4 (100%)  | 17 (100%)            |              |
| <i>Enterococcus</i> spp                  | 0 (0%)                                       | 2 (20%)      | -       | 14 (78%)  | 13 (35%)             | <b>0.004</b> |
| – <i>E. faecalis</i>                     |                                              | 0 (0%)       |         | 5 (36%)   | 3 (23%)              |              |
| – <i>E. faecium</i>                      | 0 (0%)                                       | 2 (100%)     |         | 9 (64%)   | 9 (69%)              |              |
| – VR-Enterococci                         | 0 (0%)                                       | 0 (0%)       |         | 2 (14%)   | 5 (38%) <sup>@</sup> |              |
|                                          | 0 (0%)                                       |              |         |           |                      |              |
| <i>Viridans streptococci</i>             | 0 (0%)                                       | 2 (20%)      | -       | 0 (0%)    | 3 (8%)               | 0.543        |
| Others                                   | 0 (0%)                                       | 1 (10%)<br># | -       | 0 (0%)    | 4 (11%) <sup>§</sup> | 0.291        |

60  
 61 Legend: Group A, autologous stem cell transplantation LEVO-group; Group B, autologous stem cell  
 62 transplantation NO-LEVO-group; Group C, allogeneic hematopoietic stem cell transplantation LEVO-  
 63 group; Group D, allogeneic hematopoietic stem cell transplantation NO-LEVO-group; FQs,  
 64 fluoroquinolones; MR, methicillin-resistant; CoNS, Coagulase negative staphylococci; VR, vancomycin  
 65 resistant.

66  
 67 <sup>@</sup>1 *Enterococcus casseliflavus* intrinsically resistant to vancomycin

68 <sup>#</sup>1 *Micrococcus luteus*

69 <sup>§</sup>1 *Clostridium ramosum*, 1 *Corynebacterium aurimucosum*, 2 *Streptococcus gallolyticus*

70

71

72

73

74

75           **ADDITIONAL REFERENCES**

- 76           [1] Sharrack B, Saccardi R, Alexander T, *et al.* Autologous haematopoietic stem cell transplantation and other  
77           cellular therapy in multiple sclerosis and immune-mediated neurological diseases: updated guidelines and  
78           recommendations from the EBMT Autoimmune Diseases Working Party (ADWP) and the Joint and the  
79           Joint Accreditation Committee of EBMT and ISCT (JACIE). *Bone Marrow Transplant.* 2020  
80           Feb;55(2):283-306.
- 81           [2] Mussetti A, De Philippis C, Carniti C, *et al.* CD3+ graft cell count influence on chronic GVHD in  
82           haploidentical allogeneic transplantation using post-transplant cyclophosphamide. *Bone Marrow*  
83           *Transplant.* 2018 Dec;53(12):1522-1531.
